# Supplementary material for: Environmental and human facets of the waterweed proliferation in a Vast Tropical Ramsar Wetland-Vembanad Lake System
Source: Research Square preprint supplement (doi:10.21203/rs.3.rs-1339412/v1), 2022-03-23

**Supplementary Material 2** - The water weeds menace in the VBL reflected in the print media in recent years.


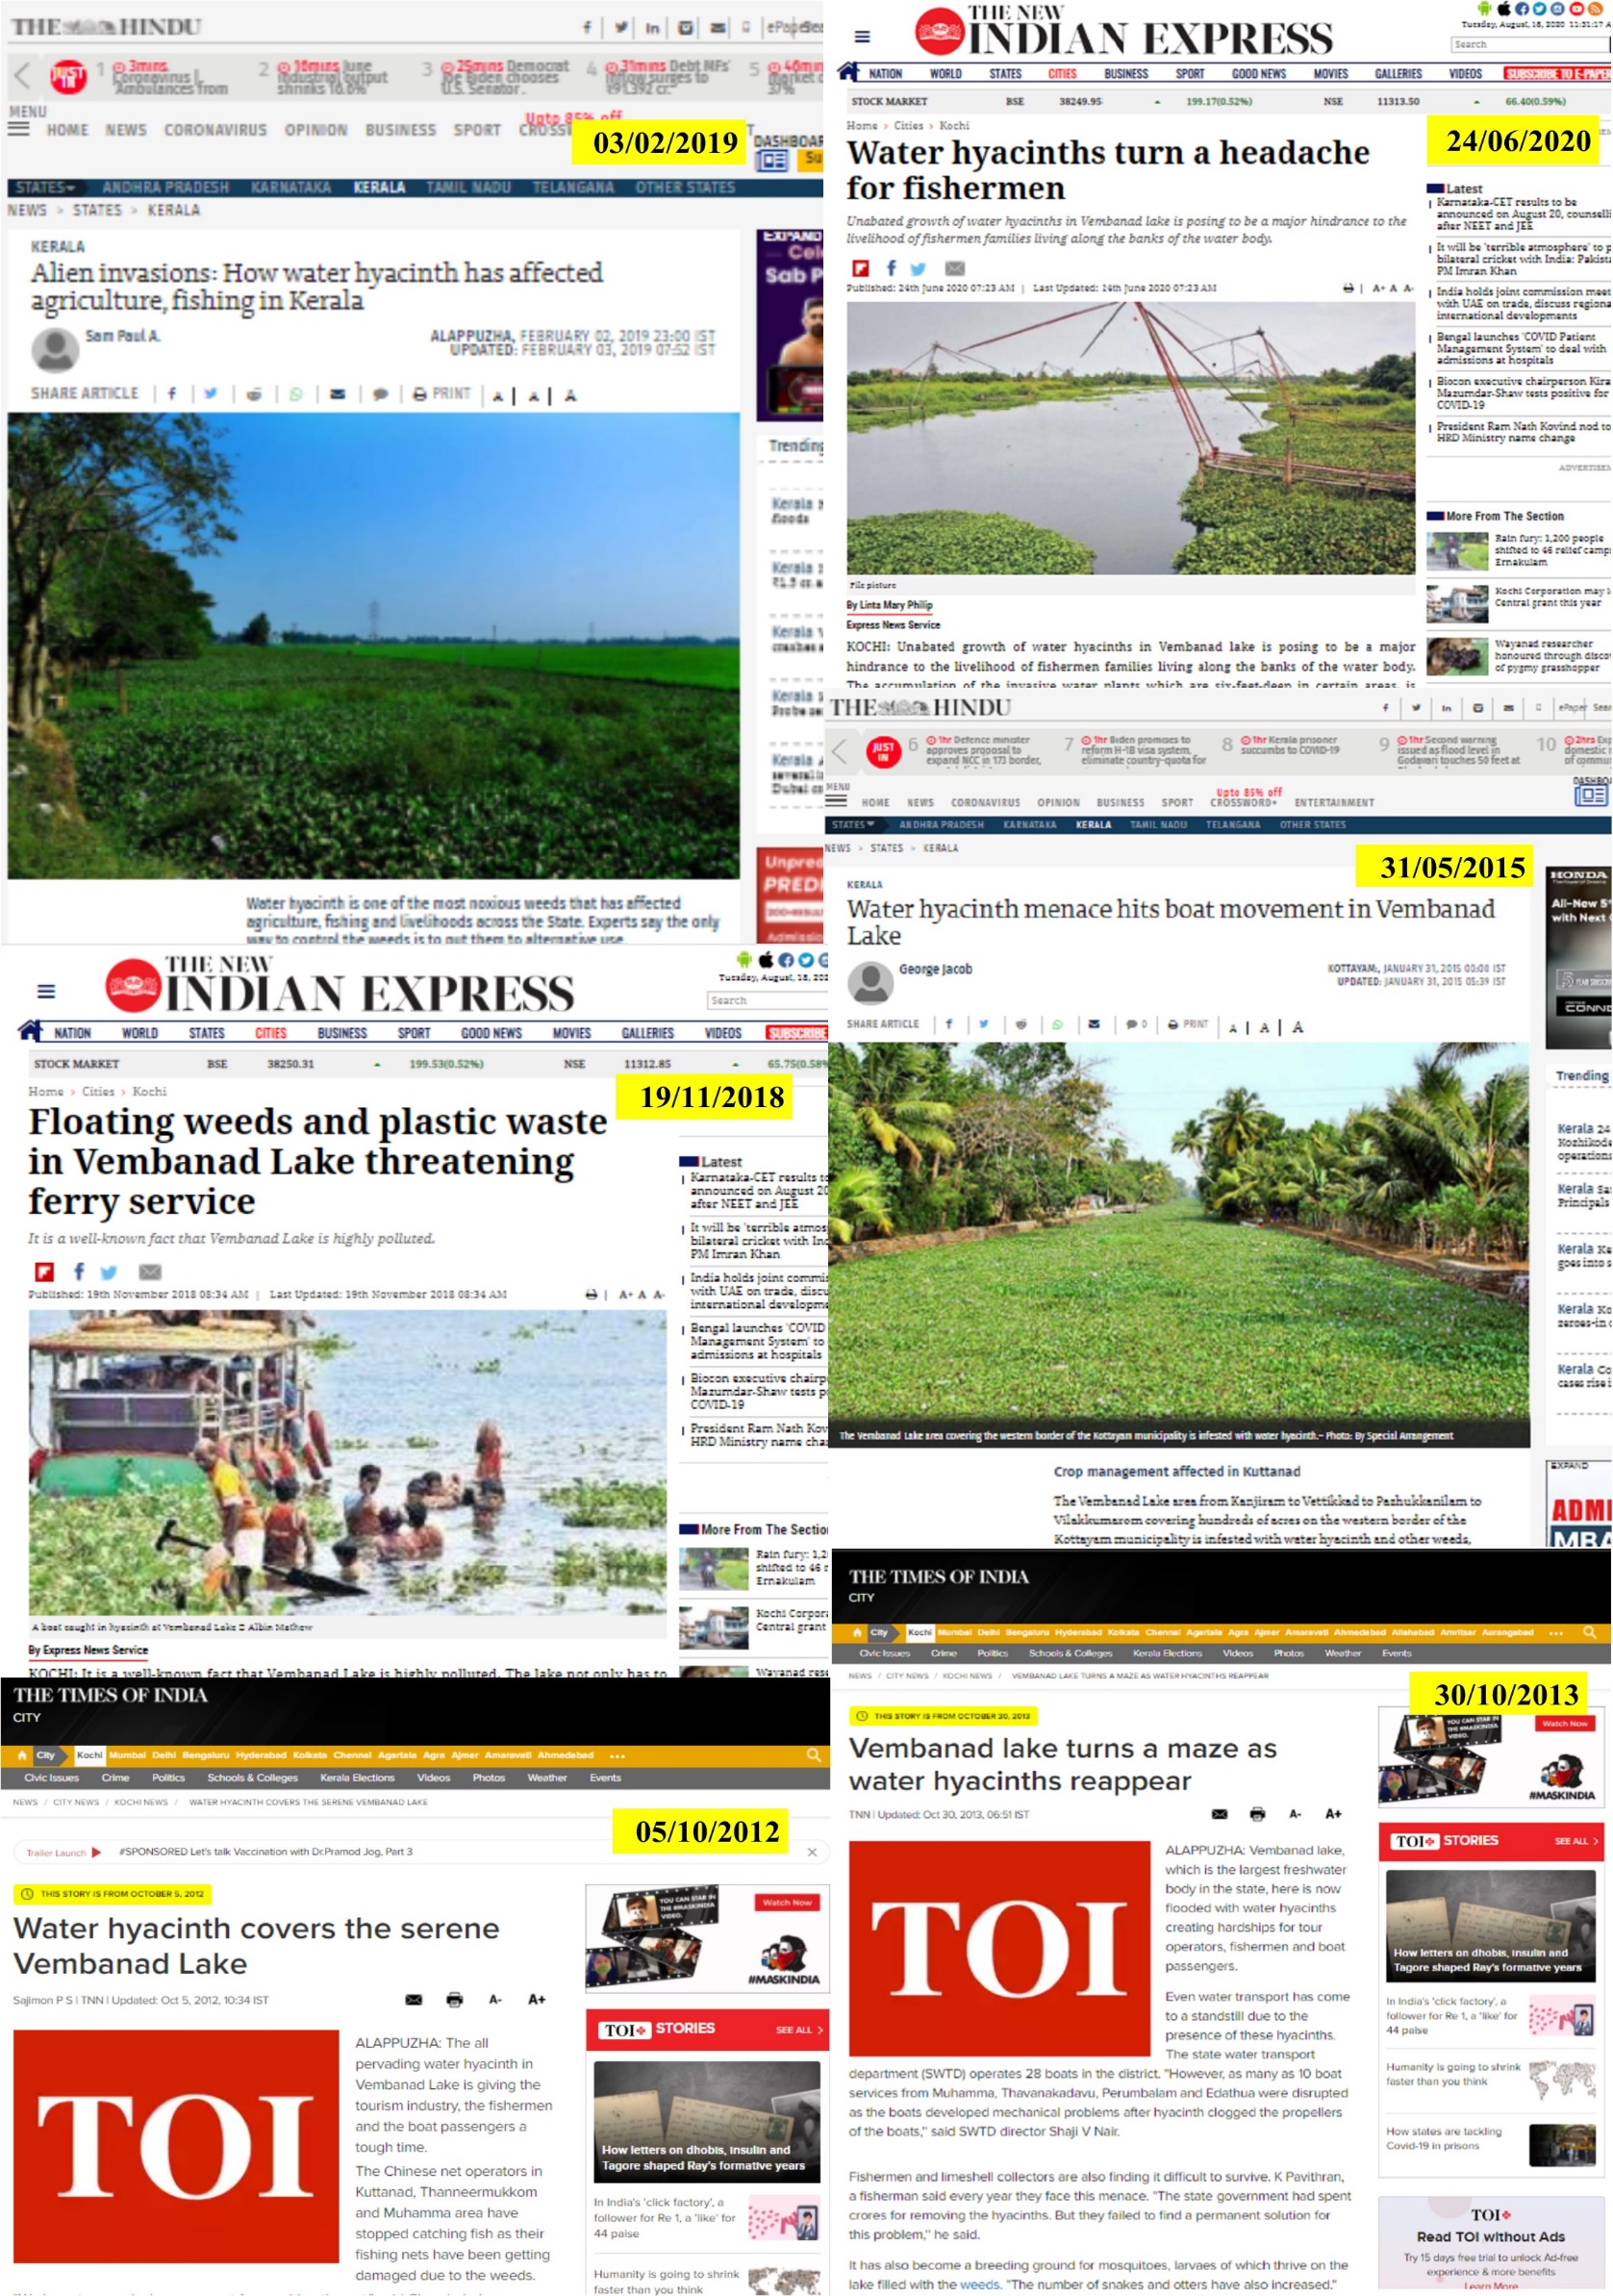

Supplement: Supplementary file 1 [file 8d20c1dbd863461cff949b79.docx]
