# Supplementary material for: Environmental and human facets of the waterweed proliferation in a Vast Tropical Ramsar Wetland-Vembanad Lake System
Source: Research Square preprint supplement (doi:10.21203/rs.3.rs-1339412/v1), 2022-03-23
Supplement: Supplementary file 1 [file fb61f7c2c0455f09cbcaa986.docx]

**Supplementary Material 5** - Global records of (I) Eicchornia *crassipes* (II) Monochoria *vaginalis* and (III) Salvinia molesta (A) 100 years ago and (B) at present, representing their rapid and widespread invasion world over (Global Biodiversity Information Facility, GBIF)


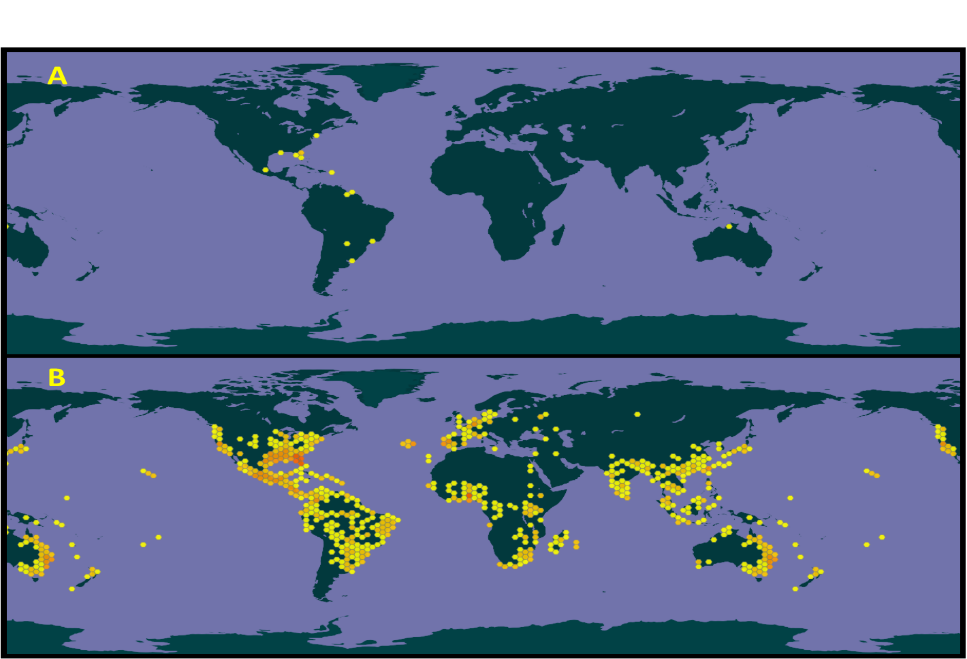


1. *E. crassipes*


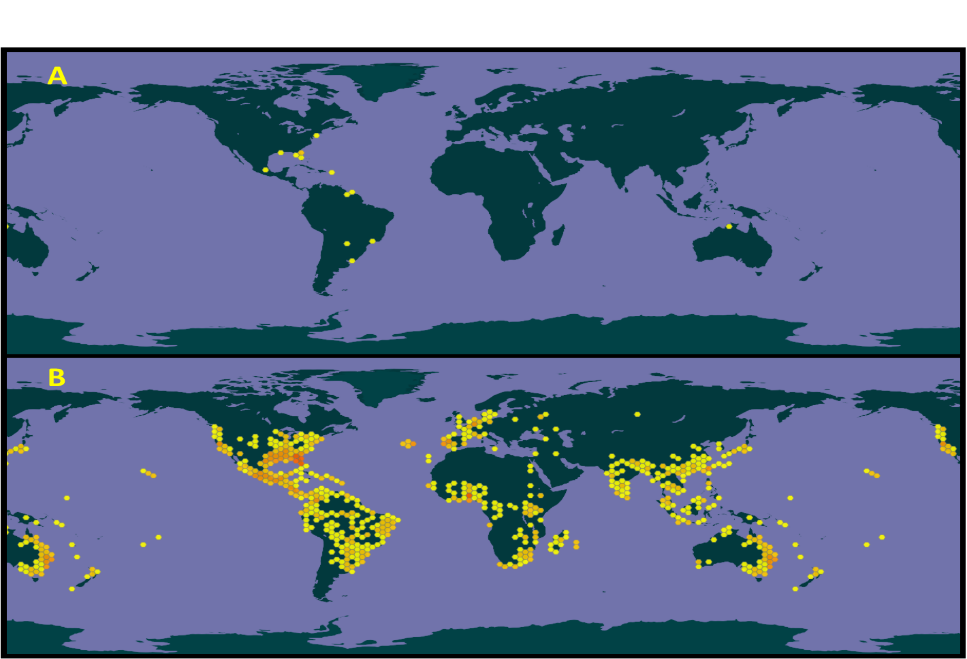


1. *Monochoria vaginalis*


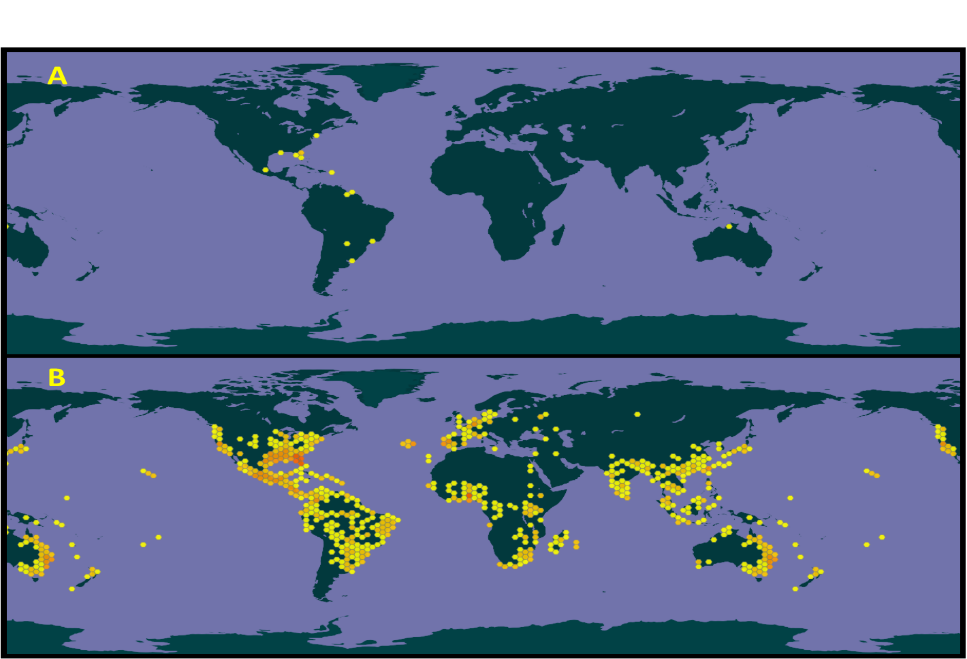


(III) Salvinia molesta
